# Supplementary material
Source: MDPI journal article supplement (https://www.mdpi.com/2673-9976/4/1/53)

**IECPS  
2020**

# 1st International Electronic Conference on Plant Science

01-15 DECEMBER 2020 | ONLINE

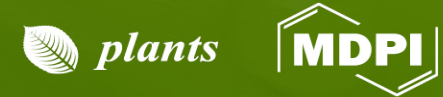

## Assessing the flowering genetic regulatory network in neotropical orchids

**Yesenia Madrigal<sup>1</sup>, Diego Ospina-Zapata<sup>1</sup>, Andrea Ramírez-Ramírez<sup>1</sup>, Juan  
Fernando Alzate<sup>2</sup> and Natalia Pabón-Mora<sup>1\*</sup>**

<sup>1</sup>Facultad de Ciencias Exactas y Naturales, Instituto de Biología, Universidad de Antioquia, Medellín, Colombia

<sup>2</sup>Centro Nacional de Secuenciación Genómica, Sede de Investigación Universitaria, Facultad de Medicina, Universidad de Antioquia, Medellín, Colombia

\* Corresponding author: [lucia.pabon@udea.edu.co](mailto:lucia.pabon@udea.edu.co)

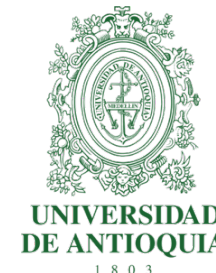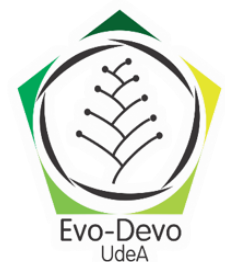

## **Abstract:**

During the reproductive transition in flowering plants a vegetative apical meristem (SAM) transforms into an inflorescence meristem (IM) that forms bracts and flowers. In grasses, like rice, a Genetic Regulatory Network (GRN) involved in reproductive transitions has been identified. It includes the integration of promoters and repressors from different gene lineages, which have undergone different duplication events at different timepoints in angiosperm diversification. With the objective to understand the evolution and expression of flowering GRN in Orchidaceae, we performed comprehensive phylogenetic analyses of all genes from the flowering GRN and analyzed by RT-PCR the expression of targeted homologs in key developmental stages. Our ML results indicate that *FT/TFL1*, *FD*, *FLC/FUL*, *SOC1* and *AGL24/SVP* gene lineages have been subject to multiple duplications in monocots as well as in Orchidaceae as a result of recorded whole genome duplication events. Conversely, *FLC* genes are lost in Orchidaceae, suggesting major changes in the repression of flowering. Our studies also show active expression of many target genes in *Elleanthus aurantiacus* (Orchidoideae) in the SAM and in IM indicating important functions in the reproductive transition. We describe how the flowering GRN in orchids has significant variations in copy number and expression patterns when compared to the canonical rice flowering GRN

**Keywords:** AGAMOUS LIKE 24; Flowering; FLOWERING LOCUS T; FLOWERING LOCUS C; FLOWERING LOCUS D; Gene Evolution; Genetic Regulatory Network; Orchidaceae; SUPPRESSOR OF OVEREXPRESSION OF CONSTANS 1.

# Flowering conditions in Angiosperms: a case of study in Orchids

*Oryza sativa*

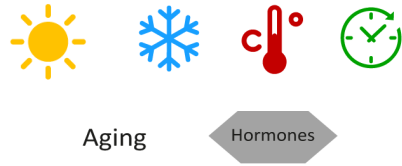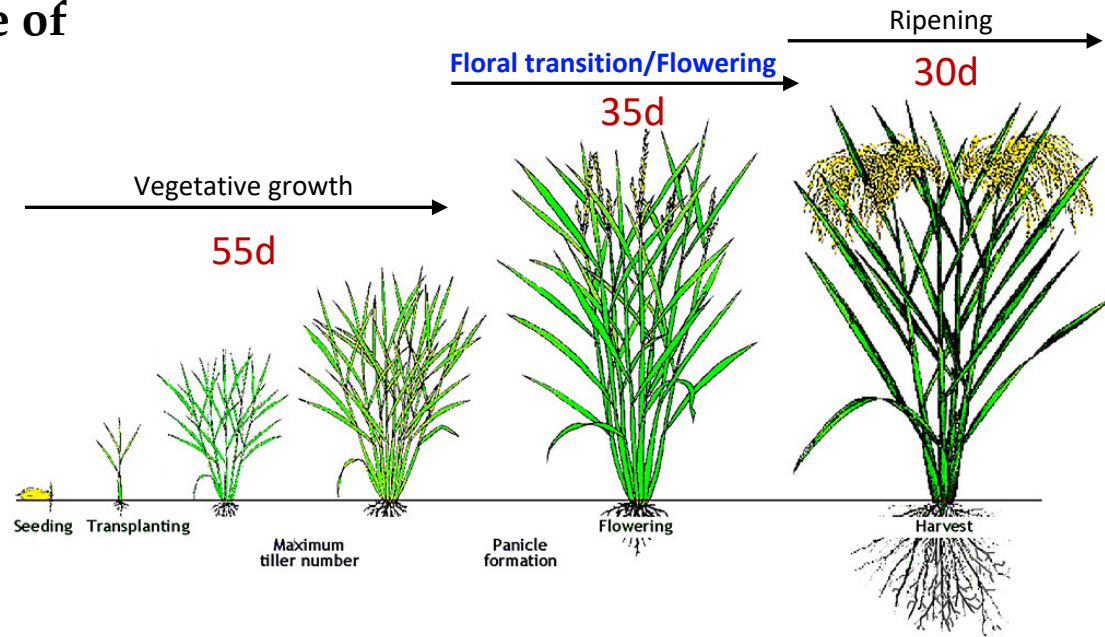

Floral patterning

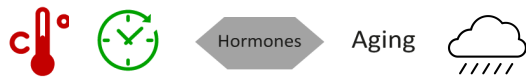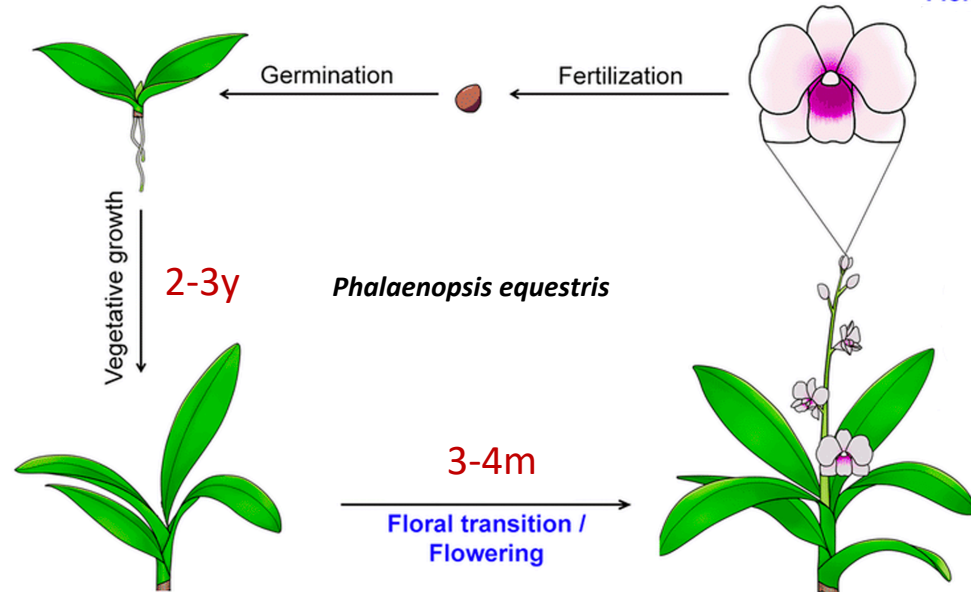

IECPS  
2020

# The reproductive transition include changes between meristem identities

## Shoot Apical Meristem (SAM)

## Inflorescence Meristem (IM)

## Floral Meristem (FM)

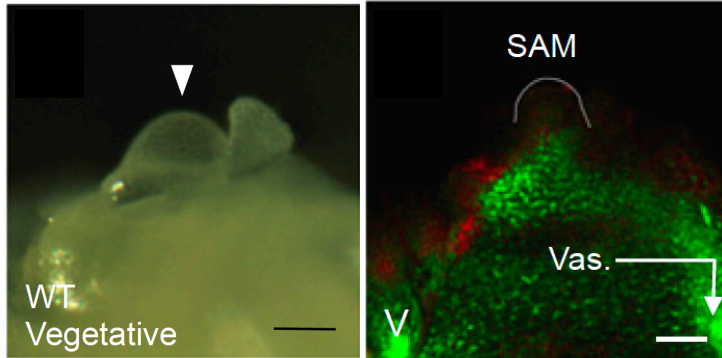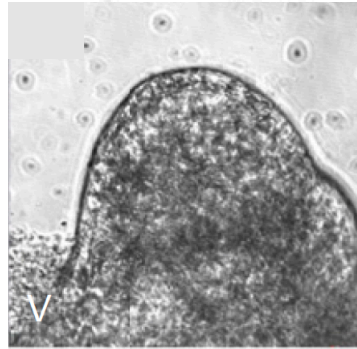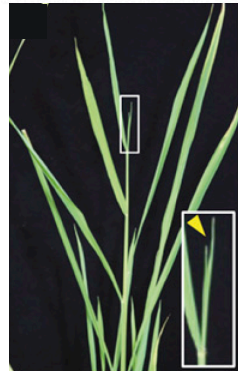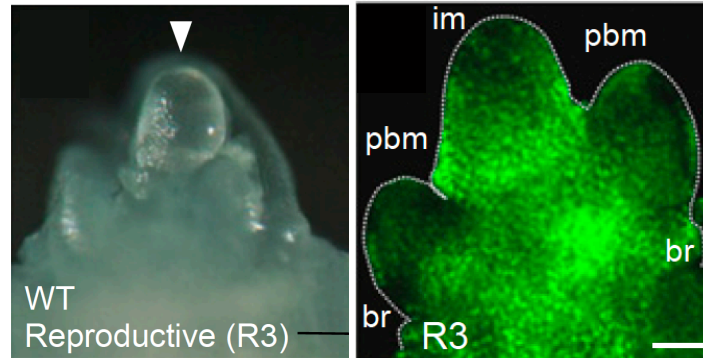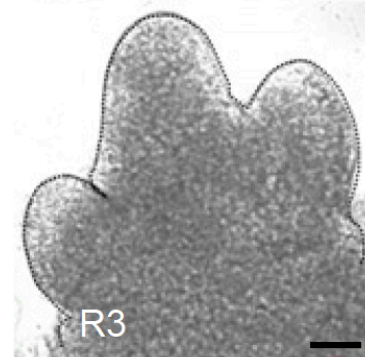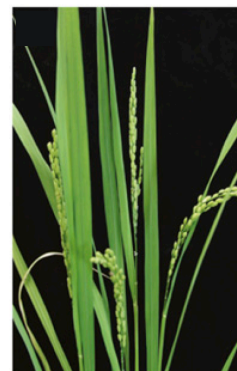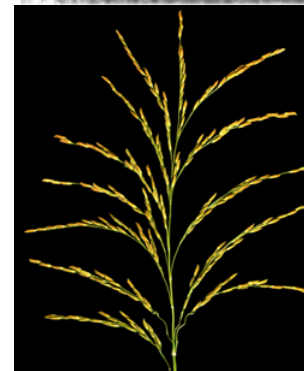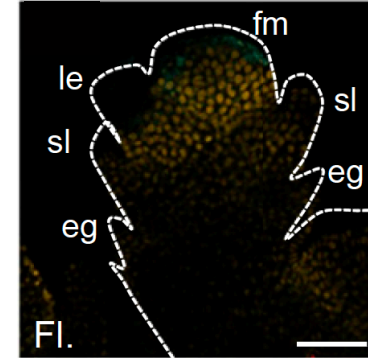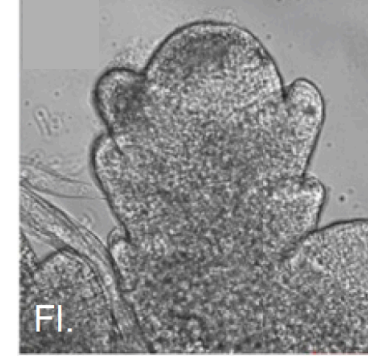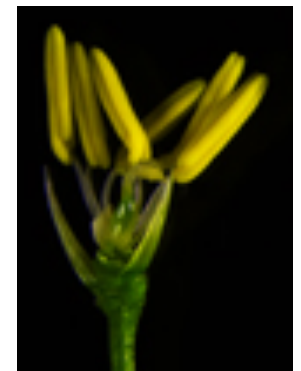

IECPS  
2020

# Summarized Genetic Regulatory Network (GRN) that controls vegetative to reproductive transition in grasses

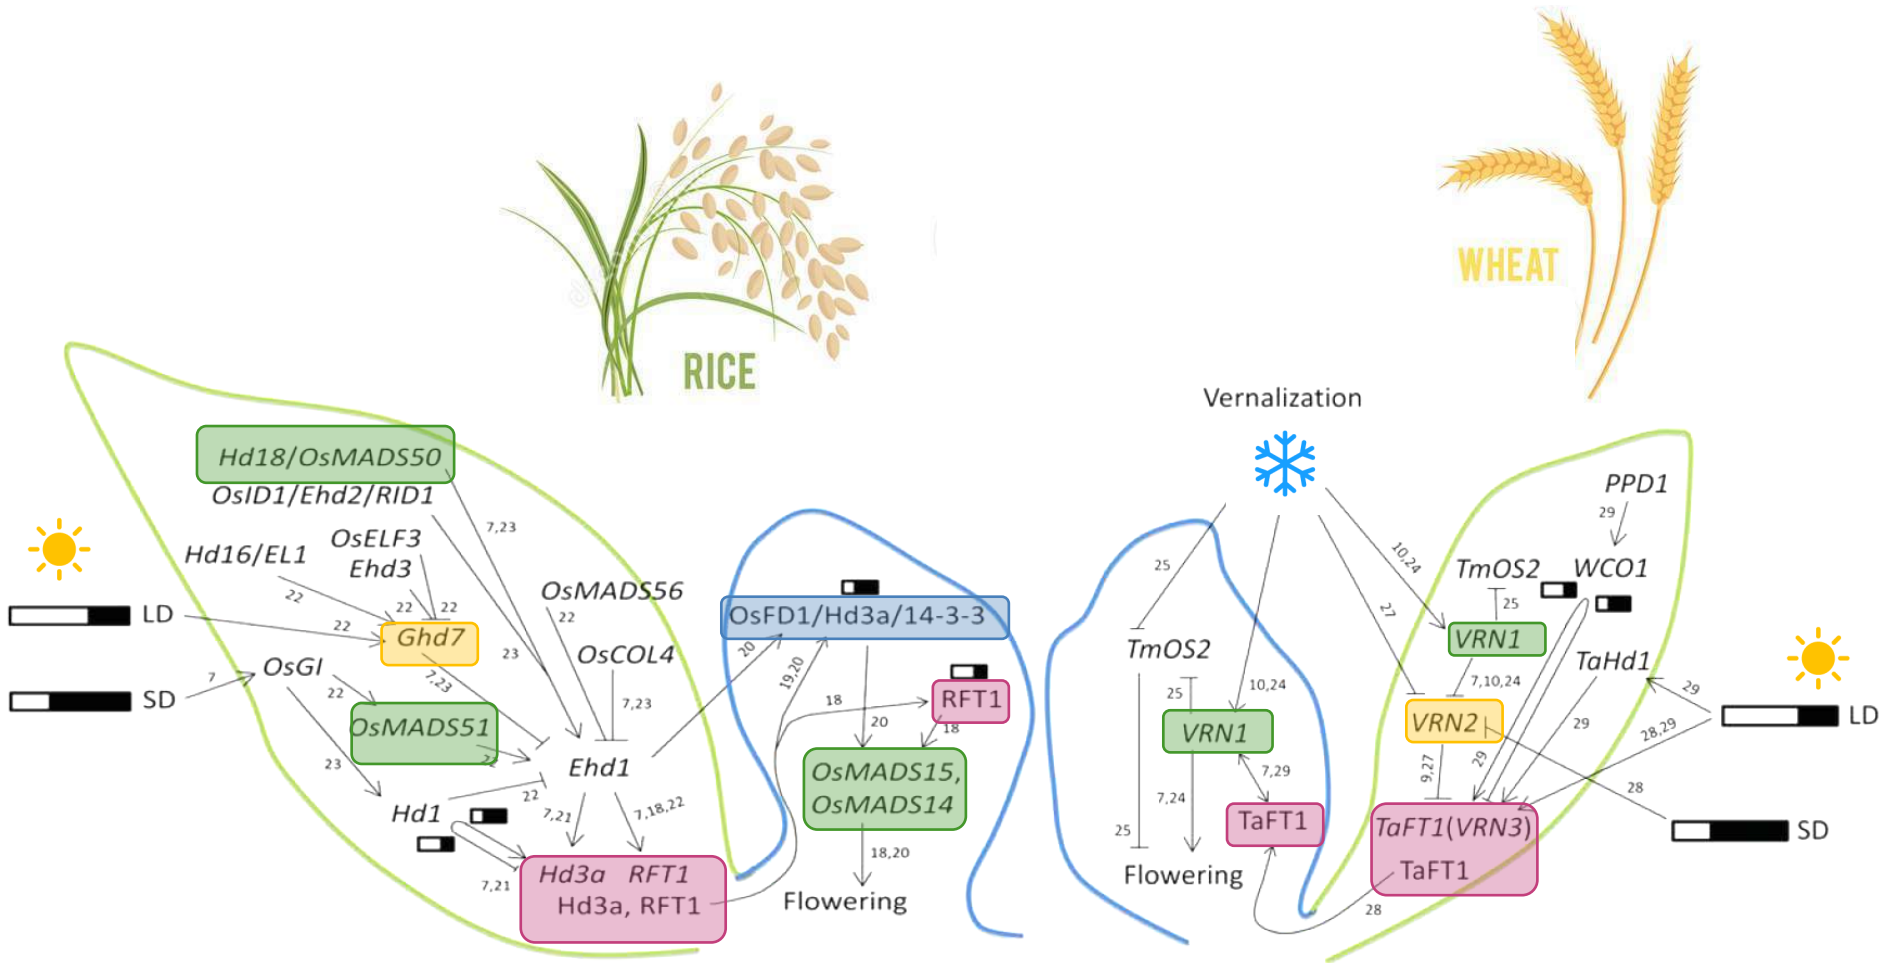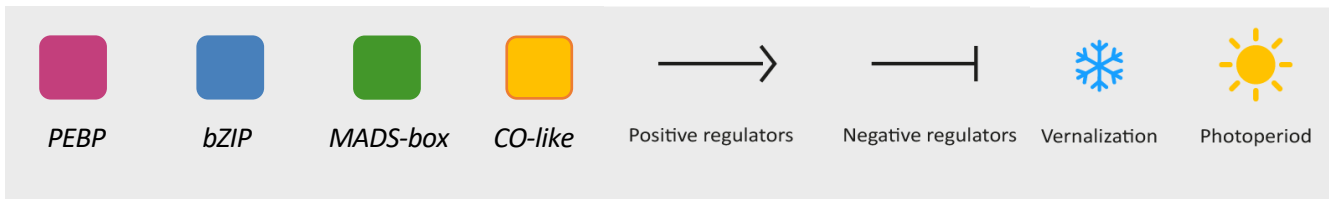

# *FT* and *TFL1* are paralogous and mobile signals with opposite functions in the transition to flowering

## FLOWERING LOCUS T (*FT*)

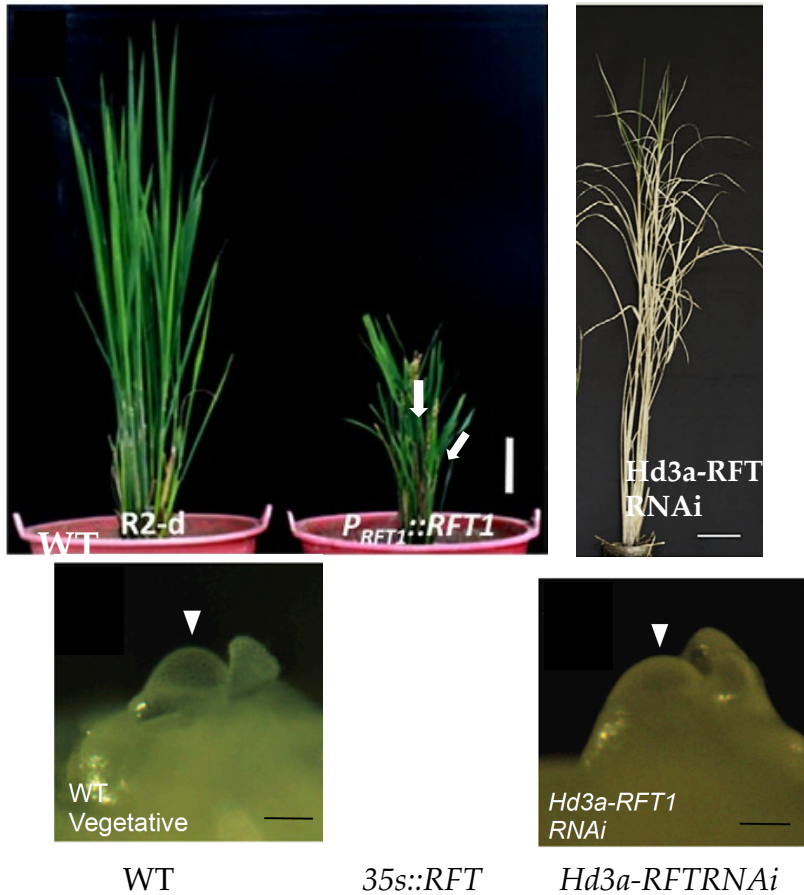

## TERMINAL FLOWER 1 GENES (*TFL1*)

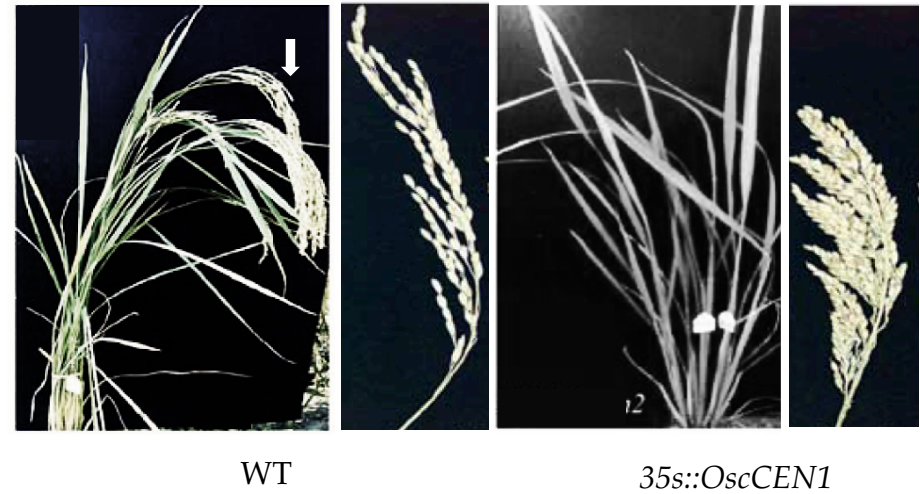

# FT interact with FD to control flowering through a Florigen Activation Complex (FAC)

## FLOWERING LOCUS D GENES (FD)

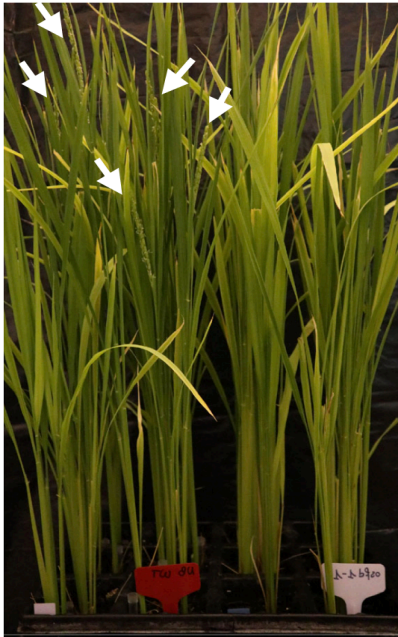

WT

*Osf1*

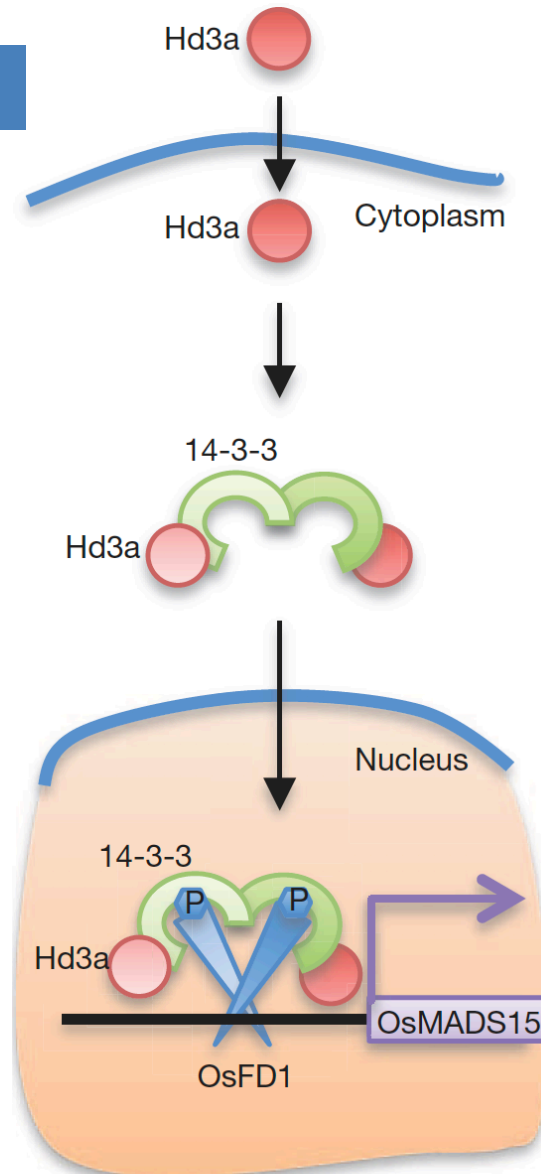

# *SOC1* together with *AGL24* directly activates Floral Meristem (FM) identity genes *AP1/FUL*

Suppressor Of Overexpression of *CONSTANS* genes (*SOC1*)

*AGAMOUS*-Like 24 genes (*AGL24*)

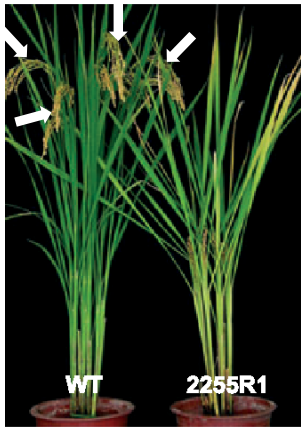

WT *Osmads50/51*

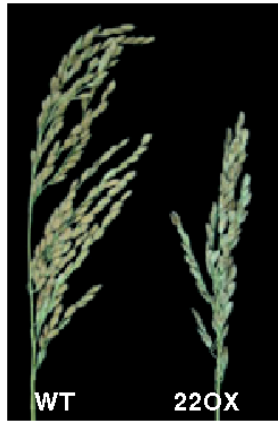

WT 35S::*OsMADS50*

*APETALA1/FRUITFULL* genes (*AP1/FUL*)

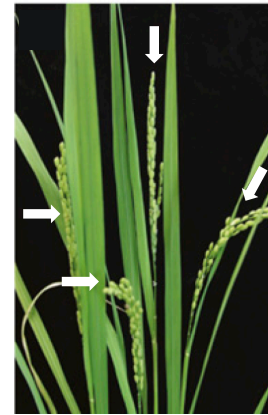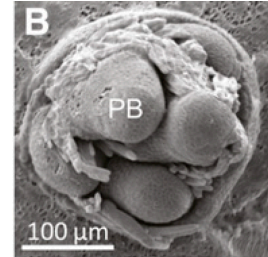

WT

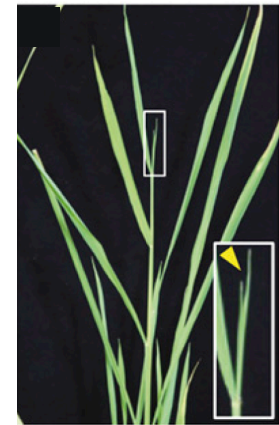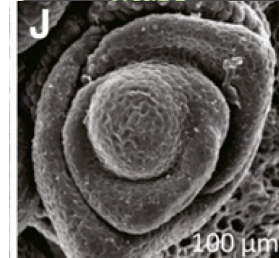

*Osmads14/15/18/pap*



# Vernalized grasses respond to cold exposure to activate flowering

## FLC-like genes

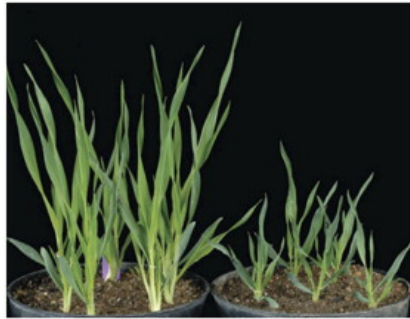

WT OxHvOS2-20

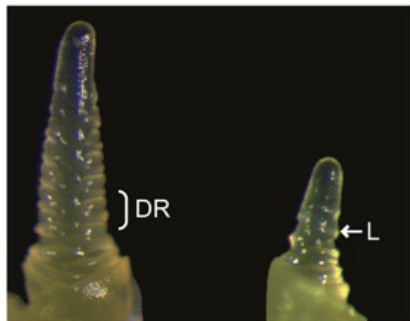

WT OxHvOS2-20

## VRN2 genes

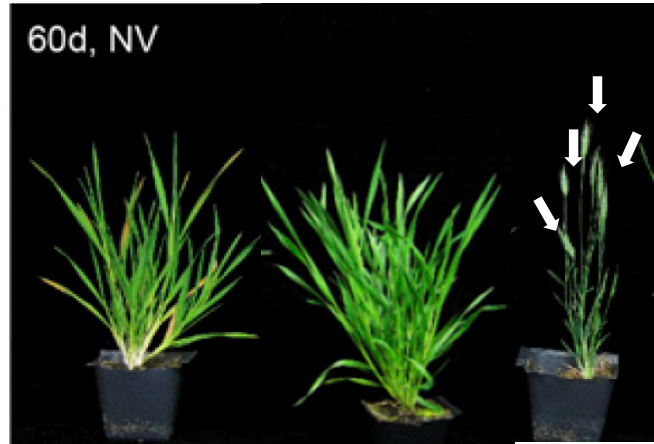

WT UBI:VRN2 Bdvrn2

## VRN1 genes

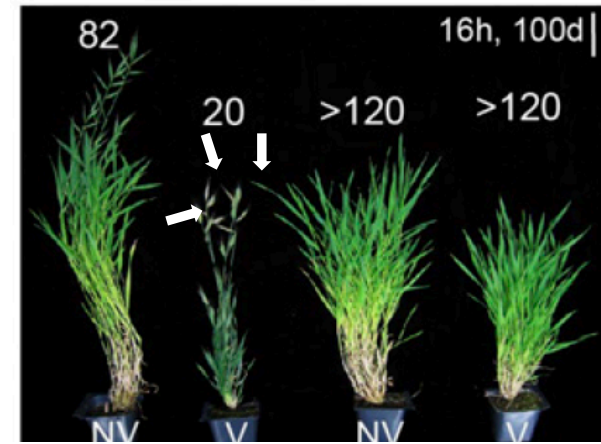

WT Bdvrn1

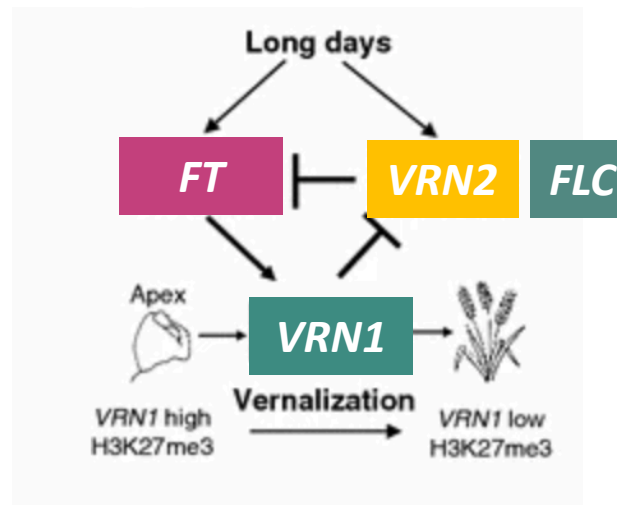

There are only some reports on the expression of *FT/TFL1* and *MADS-box* genes in orchids

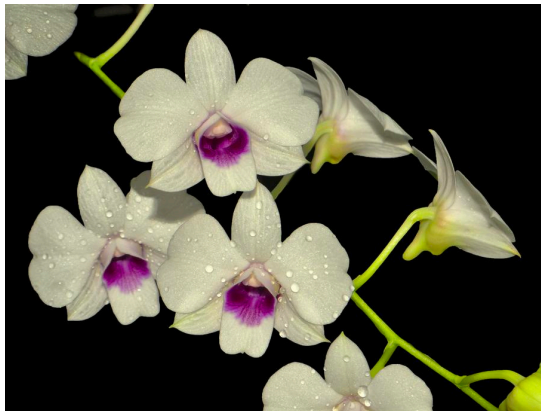

*Dendrobium* Chao Praya Smile

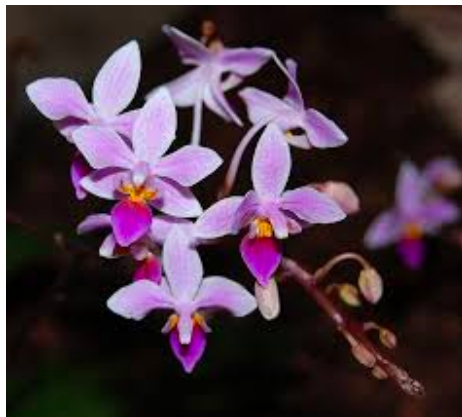

*Phalaenopsis equestris*

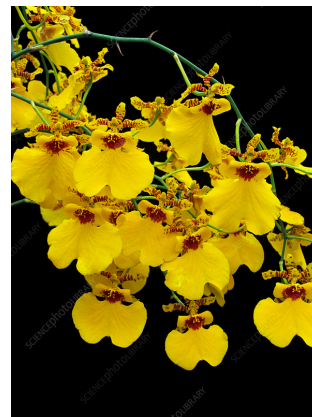

*Oncidium* Gower Ramsey

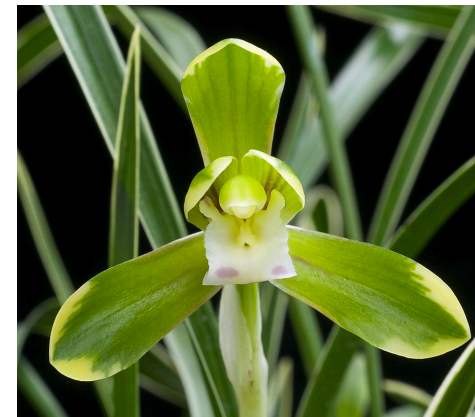

*Cymbidium goeringii*

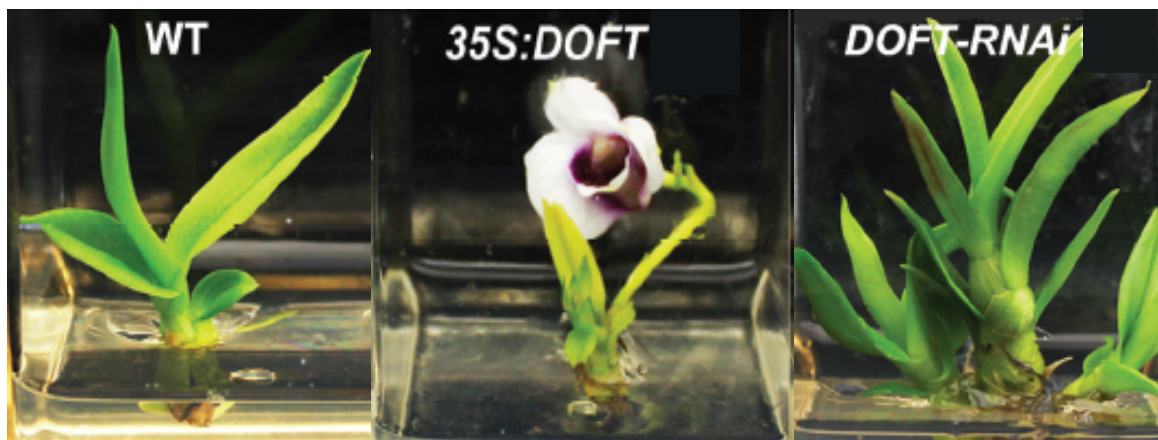

**FT genes in *Dendrobium* that are involved in the promotion of flowering**

# Orchid genetic complement is not the same than model species

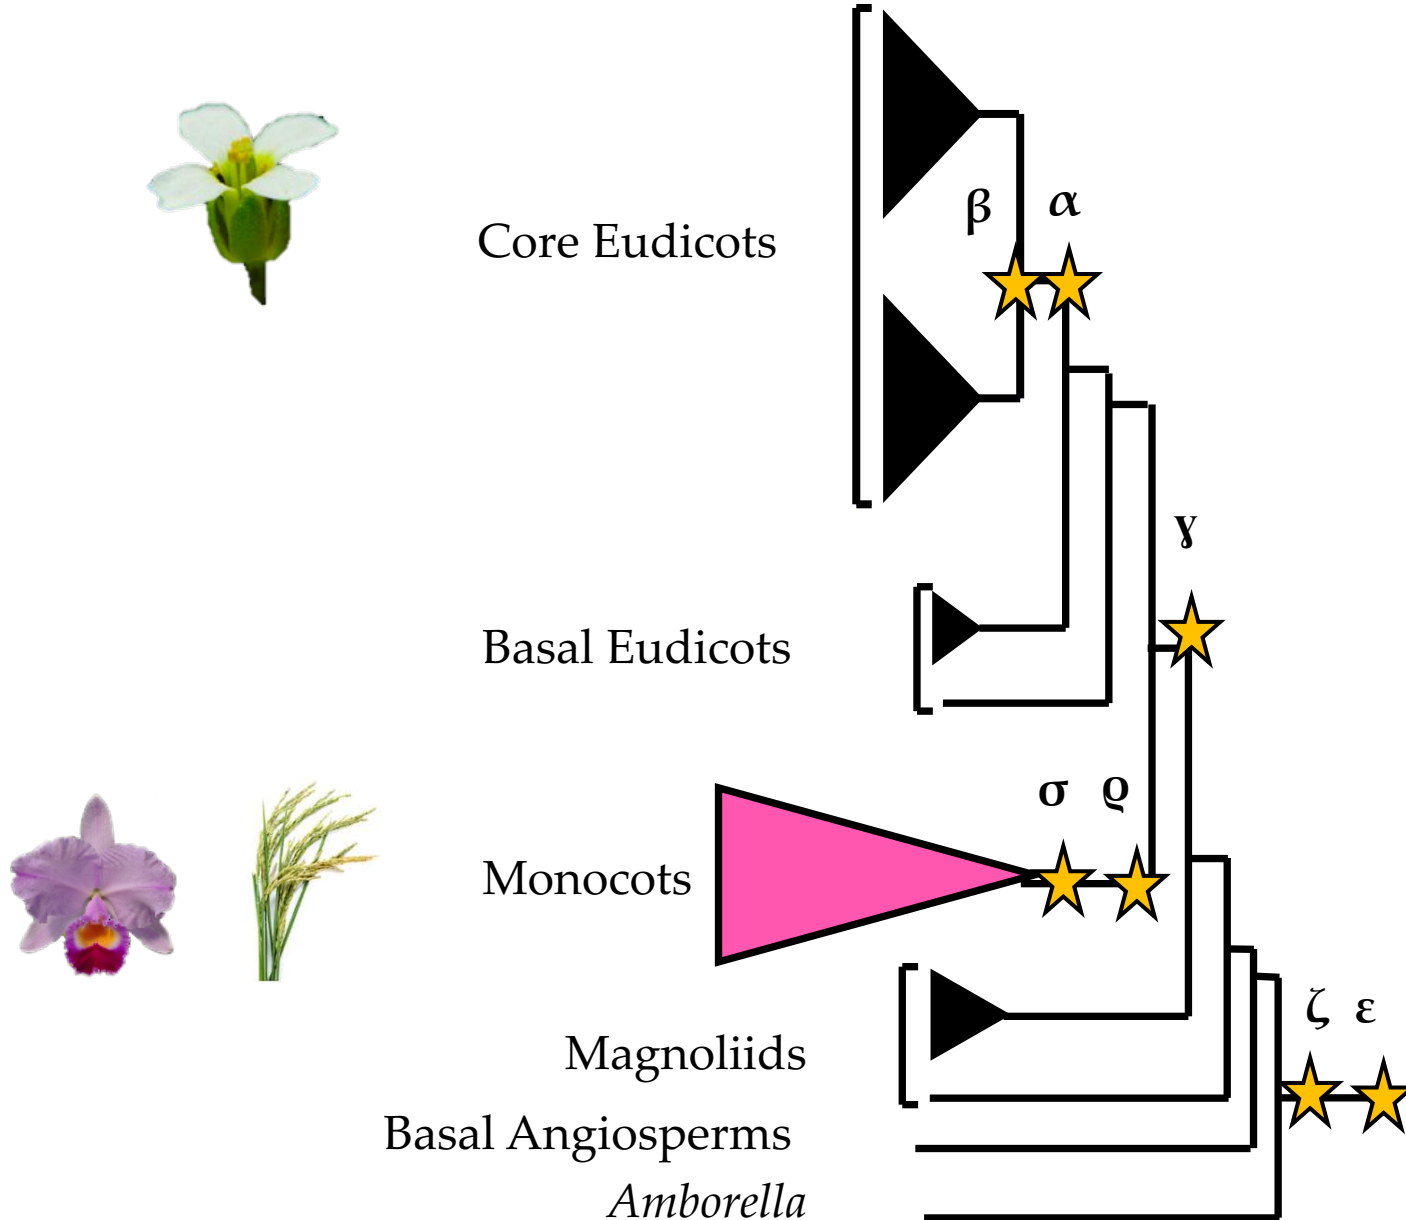

# Results: We have sequenced 13 neotropical orchid mixed transcriptomes

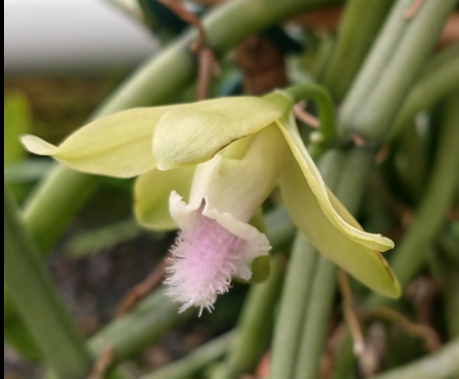

*Vanilla aphylla*

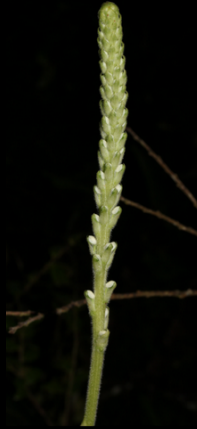

*Gomphichis scaposa*

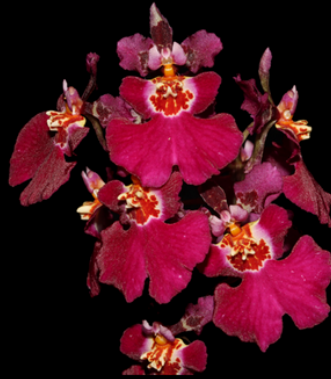

*Tolumnia* Cherry red x Ralph yagi

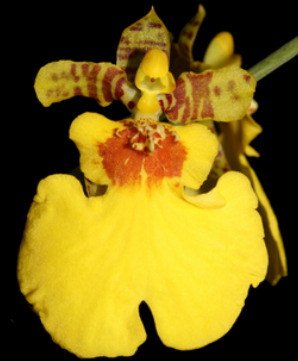

*Oncidium* Grower Ramsey

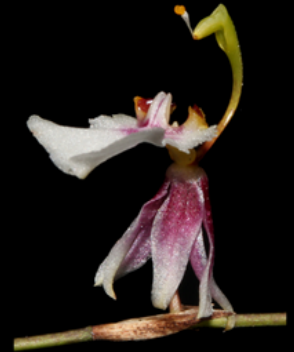

*Oncidium* Twinkle

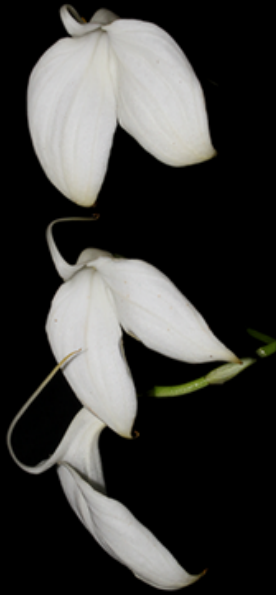

*Masdevallia coccinea*

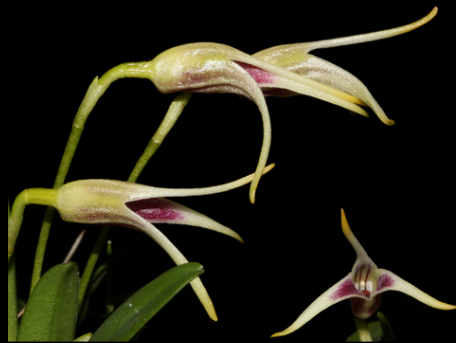

*Masdevallia wendlandiana*

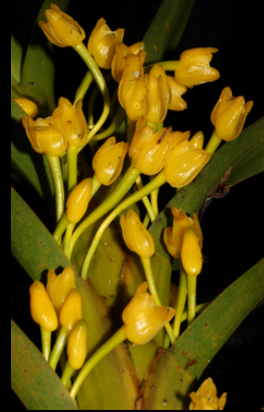

*Maxillaria aurea*

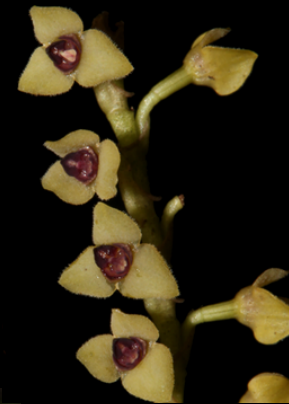

*Stelis pusilla*

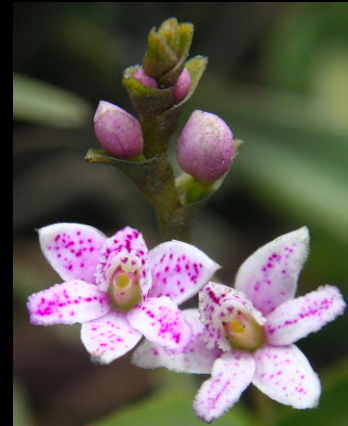

*Epidendrum fimbriatum*

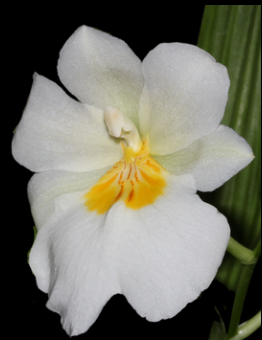

*Miltoniopsis roezlii*

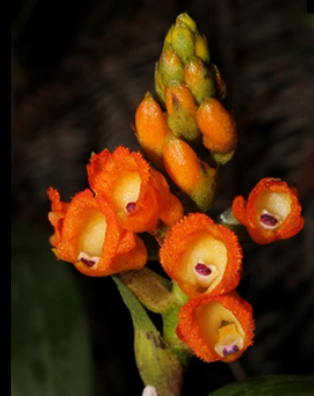

*Elleanthus aurantiacus*

# FT genes have undergone a lot of duplications in Angiosperms

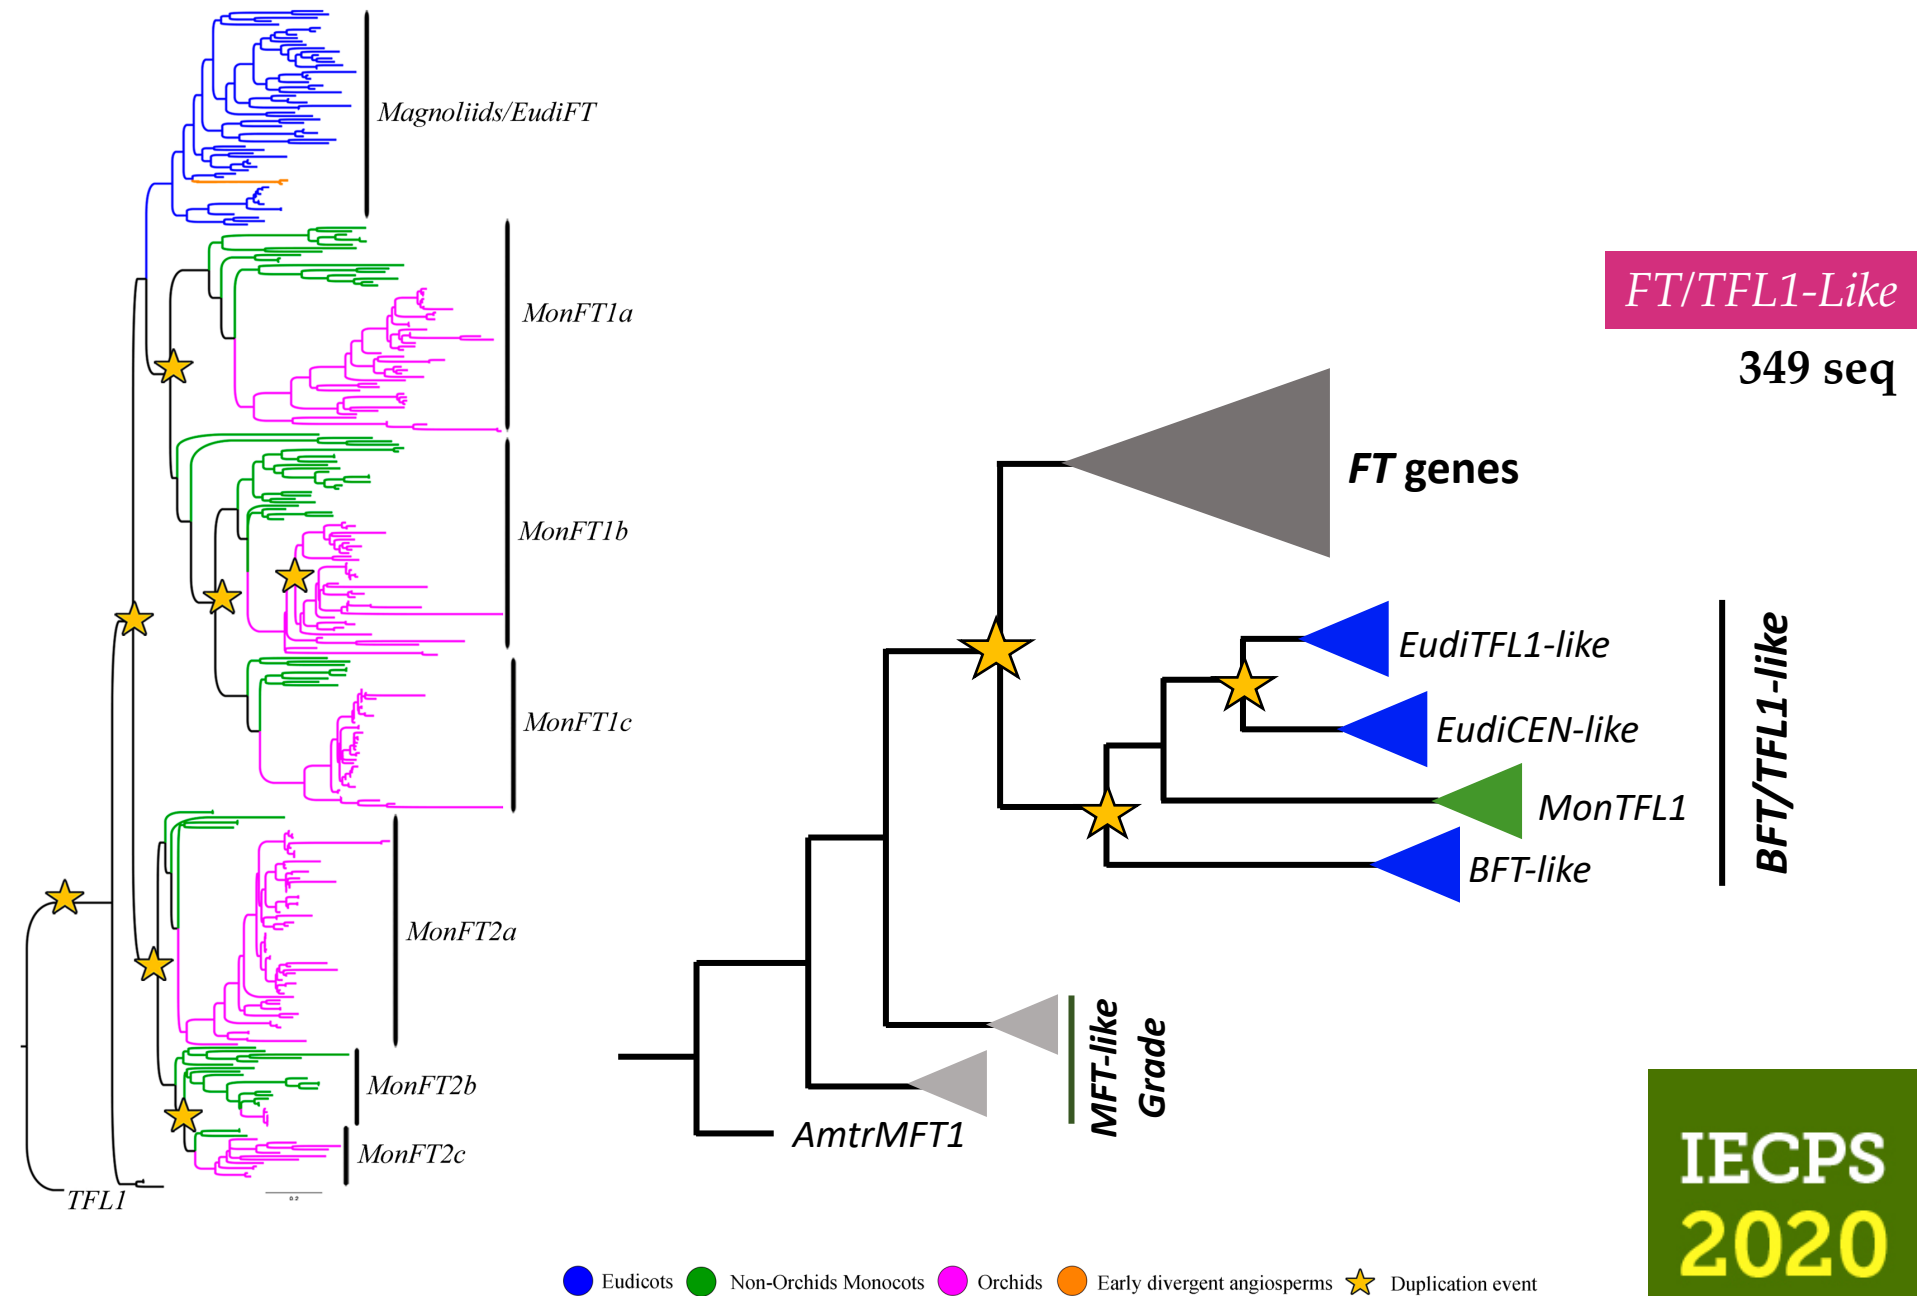

# FD genes have undergone at least three duplication events prior to the diversification of the Orchidaceae

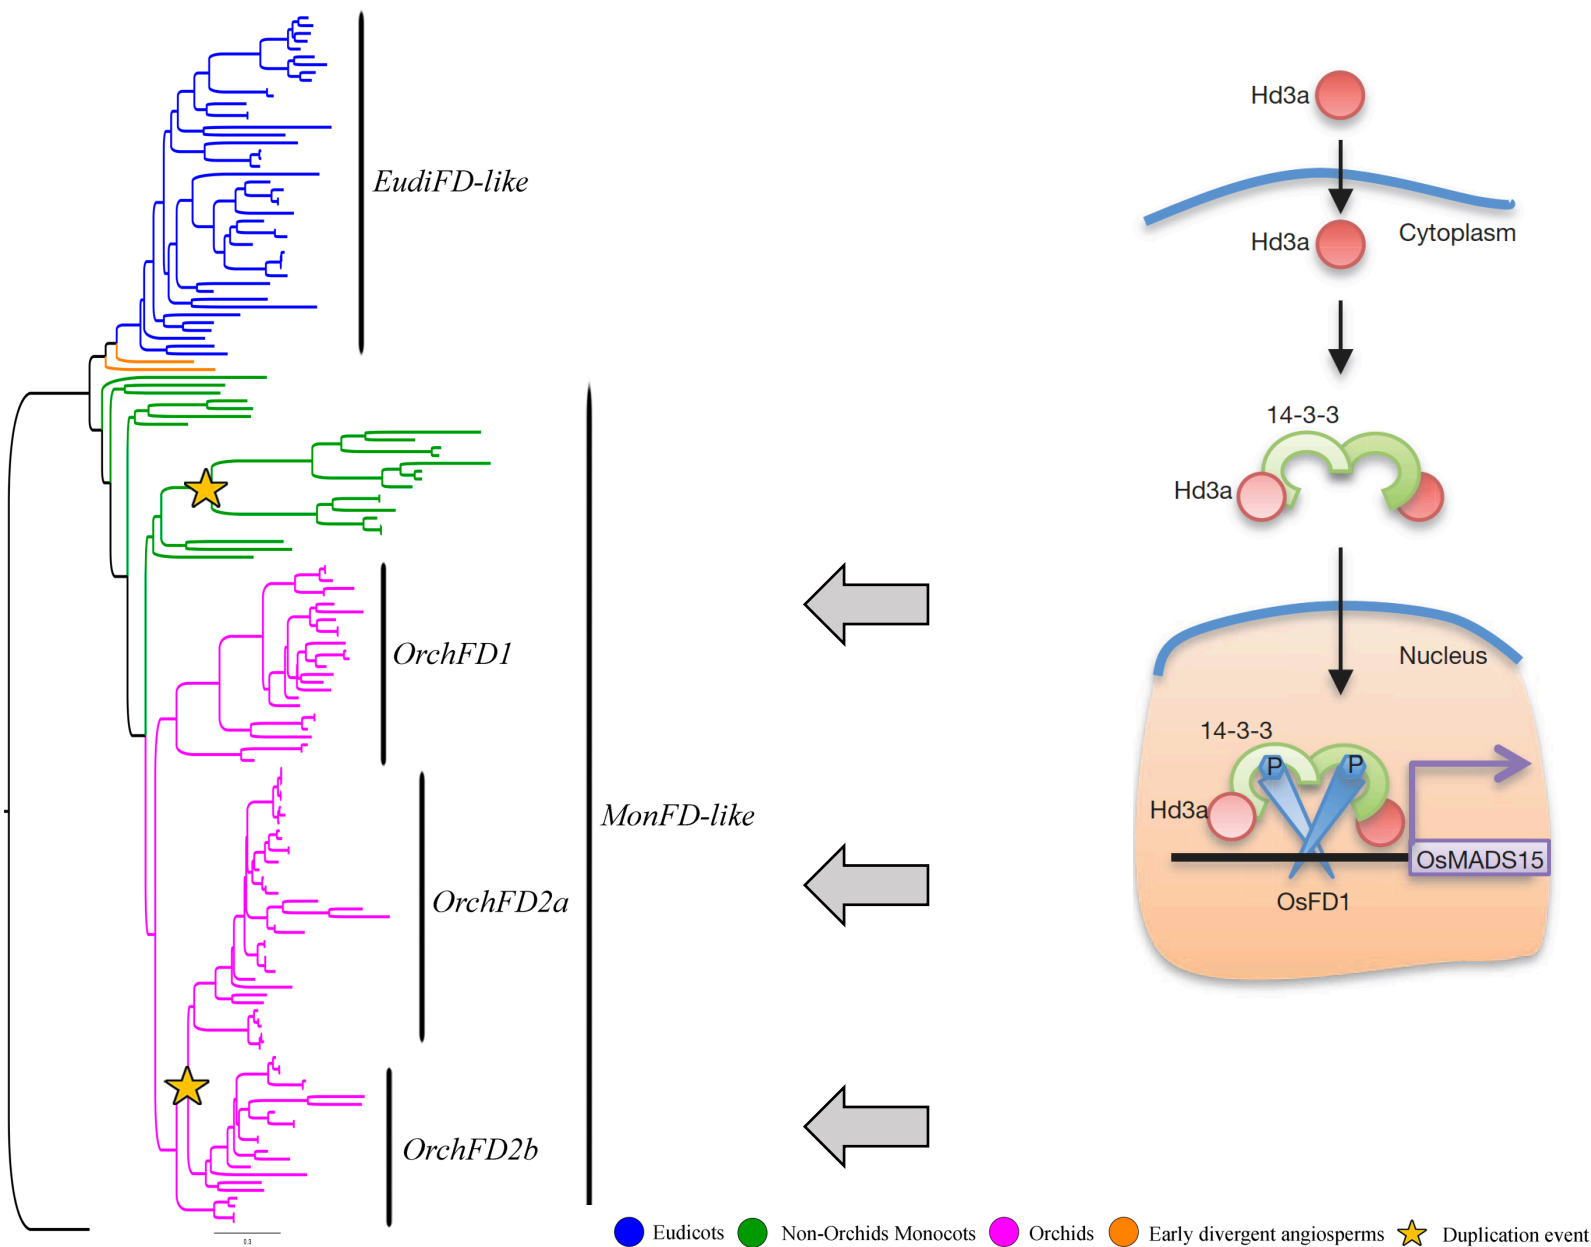

# Orchidaceae have at least three copies of *AGL24/SVP* genes

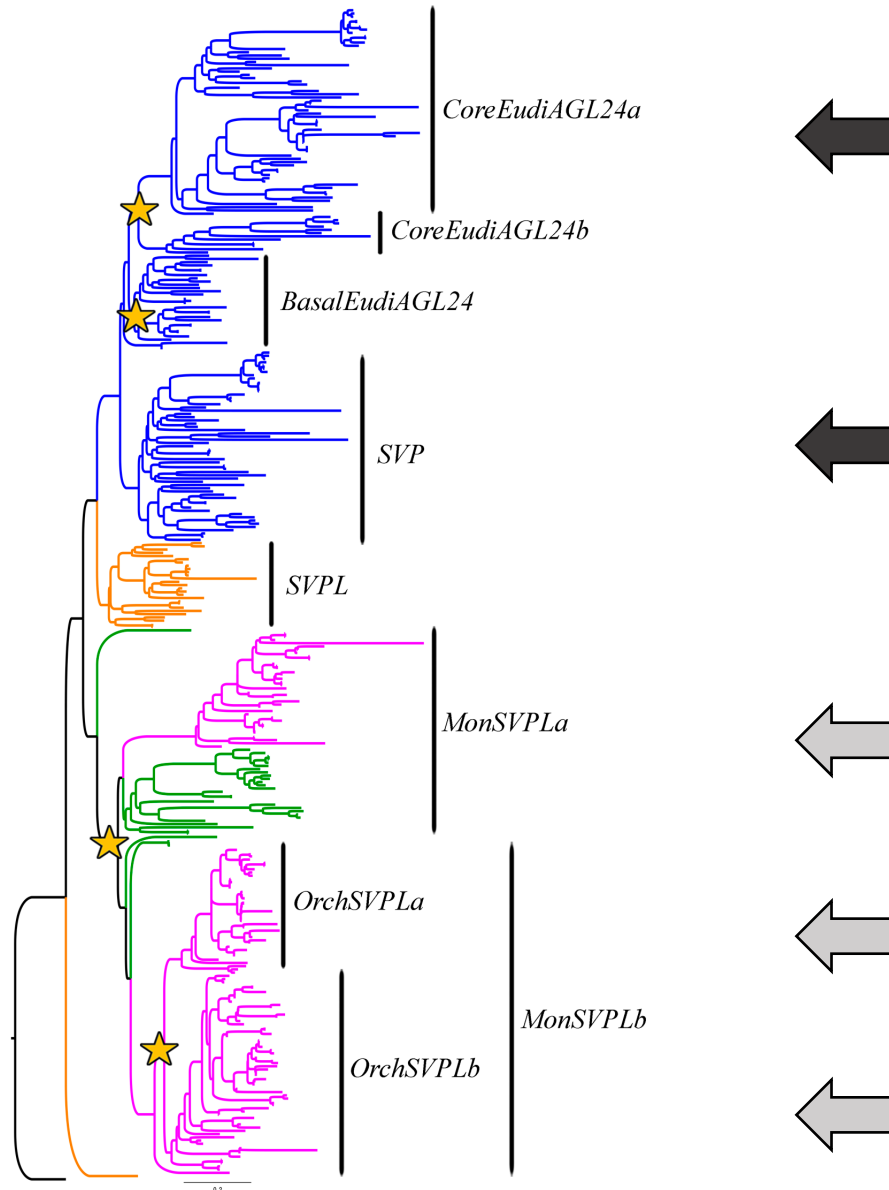

*AGL24/SVP*-like

363 seq

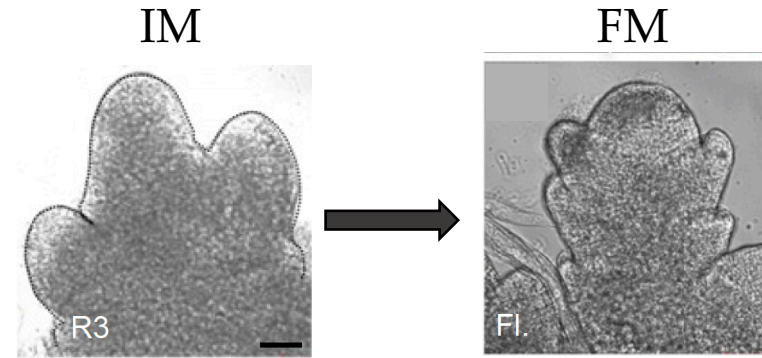

The *AGL24* and *SVP* clades are eudicot specific.

IECPS  
2020

# SOC1 genes have three independent duplications prior to the diversification of the Orchidaceae.

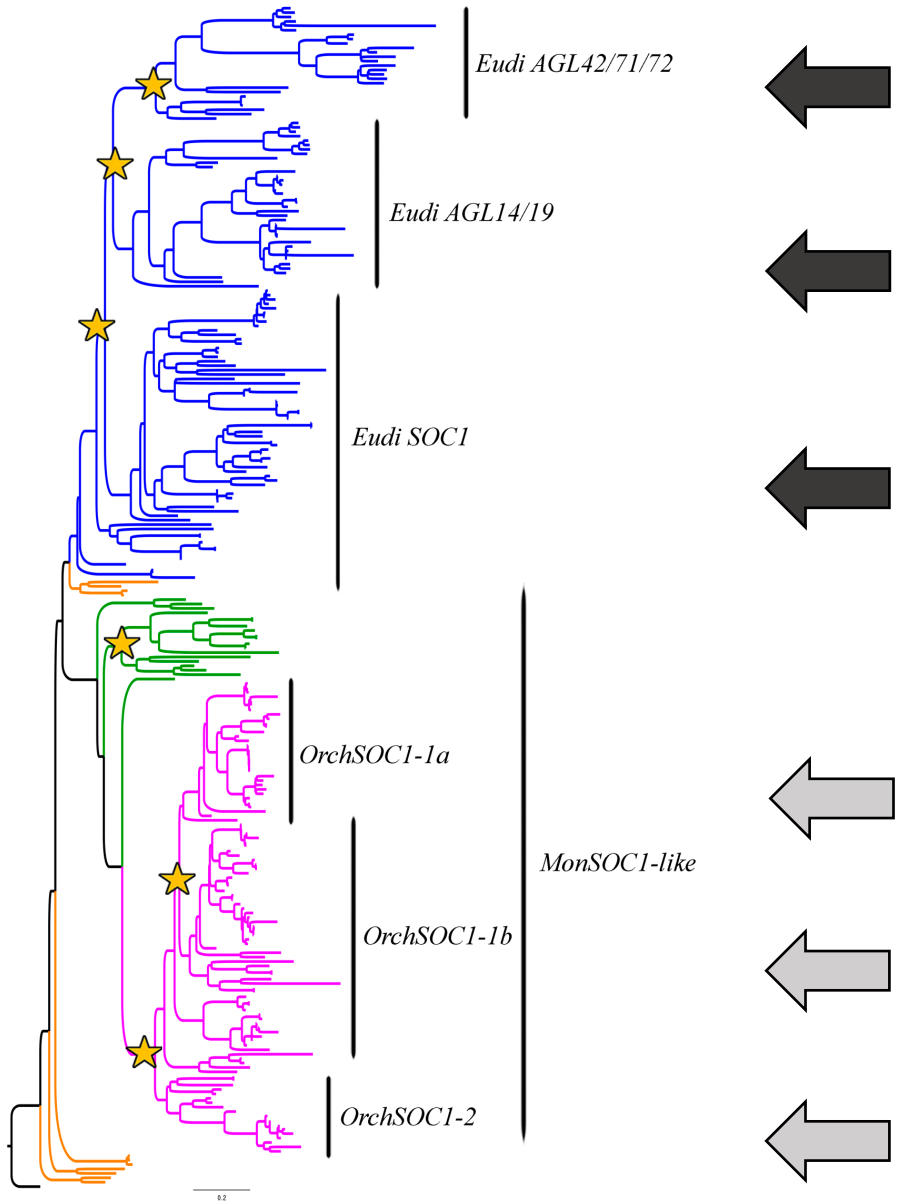

SOC1-like

268 seq

IM

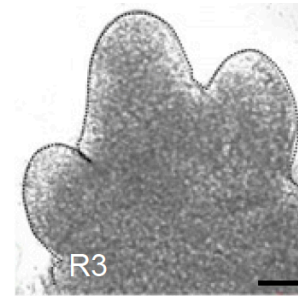

FM

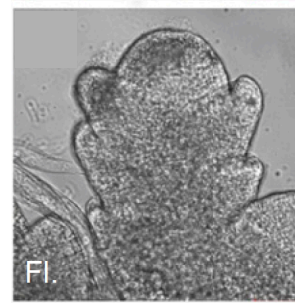

SOC1 genes have at least three duplications prior to the diversification of eudicots.

IECPS  
2020



# FLC repressor and VRN1 promoter genes are lacking in orchids

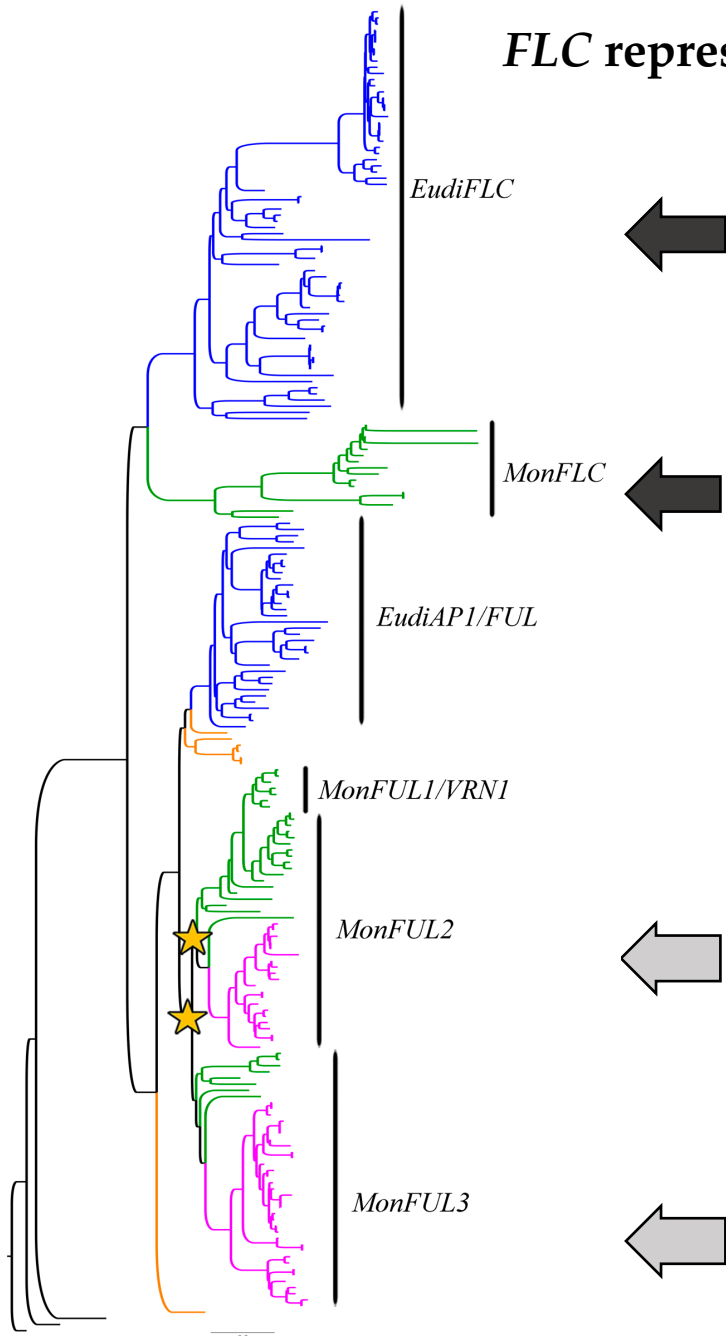

FLC/FUL

215 seq

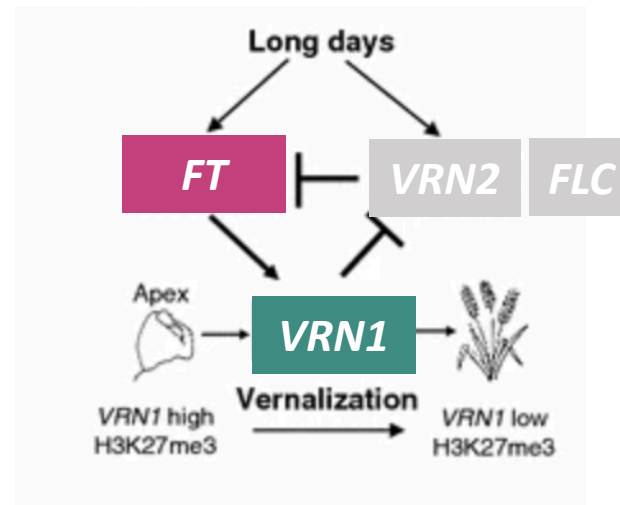

FUL homologs are duplicated in both eudicots and monocots

# Developmental stages in flowering transition in *Elleanthus aurantiacus*

## Shoot Apical Meristem (SAM)

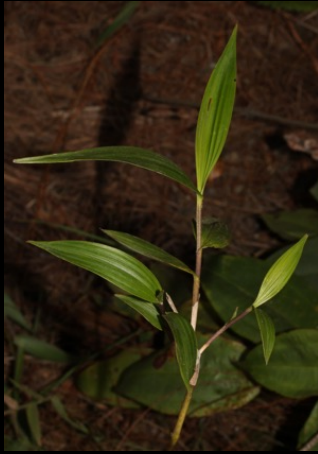

## Inflorescence Meristem (IM)

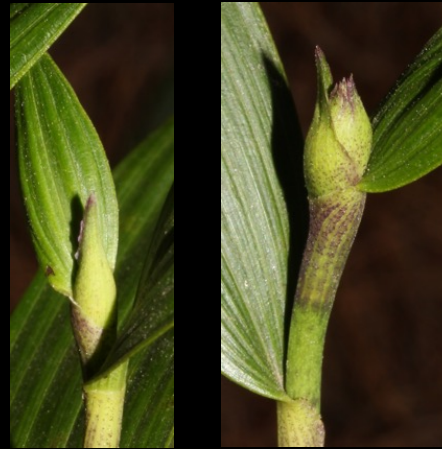

## Floral Meristem (FM)

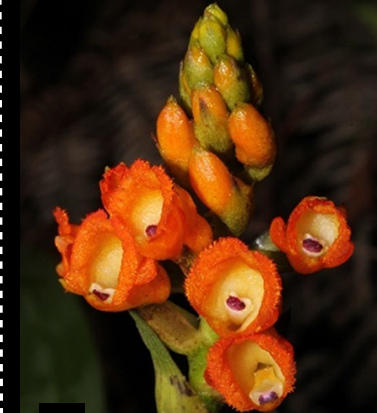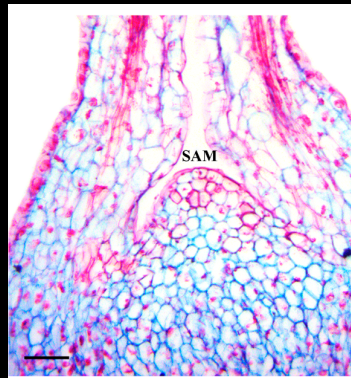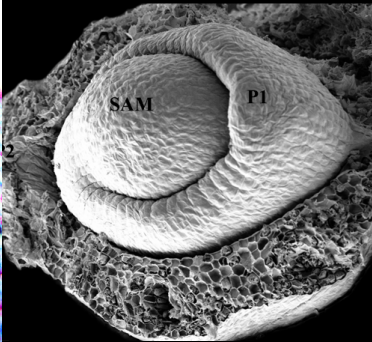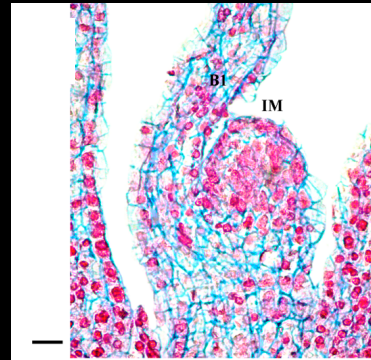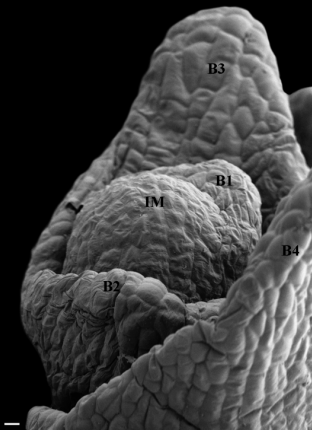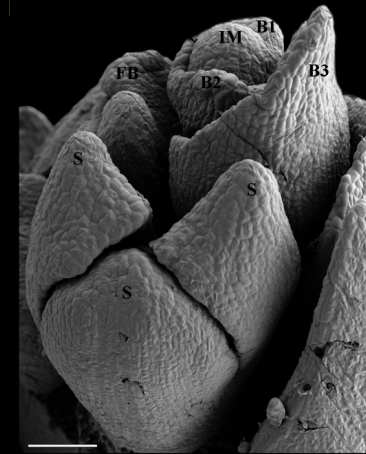

*E. aurantiacus* plants grow on 1400-2700m altitude and form racemose inflorescences on rainy season two times per year

# Qualitative expression analysis of GNR in *Elleanthus aurantiacus*

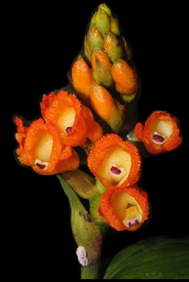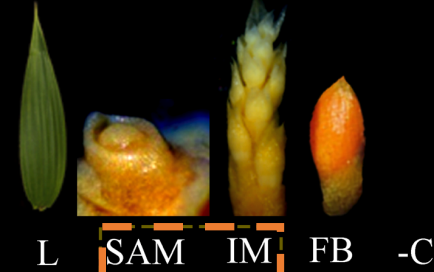

GRN genes are expressed in the SAM and in IM, suggesting important functions in the reproductive transition

PEBP

bZip

MADS-box

*ElauFT1A*  
*ElauFT1C\_1*  
*ElauFT1C\_2*  
*ElauFT2A\_1*  
*ElauFT2A\_2*  
*ElauMFT*  
*ElauFD1*  
*ElauFD2*  
*ElauSOC1-1*  
*ElauSOC1-2*  
*ElauSOC1-3*  
*ElauSVP1*  
*ElauSVP2*  
*ElauSVP3*  
*ElauSVP4*  
*ElauSVP5*  
*ElauSVP6*  
*ElauSVP7*  
*ElauGADPH*  
*ElauActin*

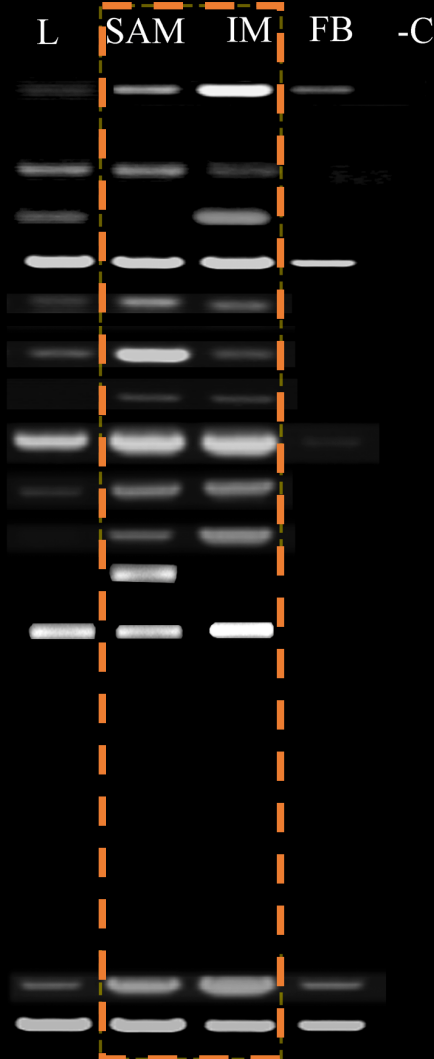

# Conclusions

1: GRN in orchids have undergone different evolution pathways in comparison with grass model species, due to independent duplication events

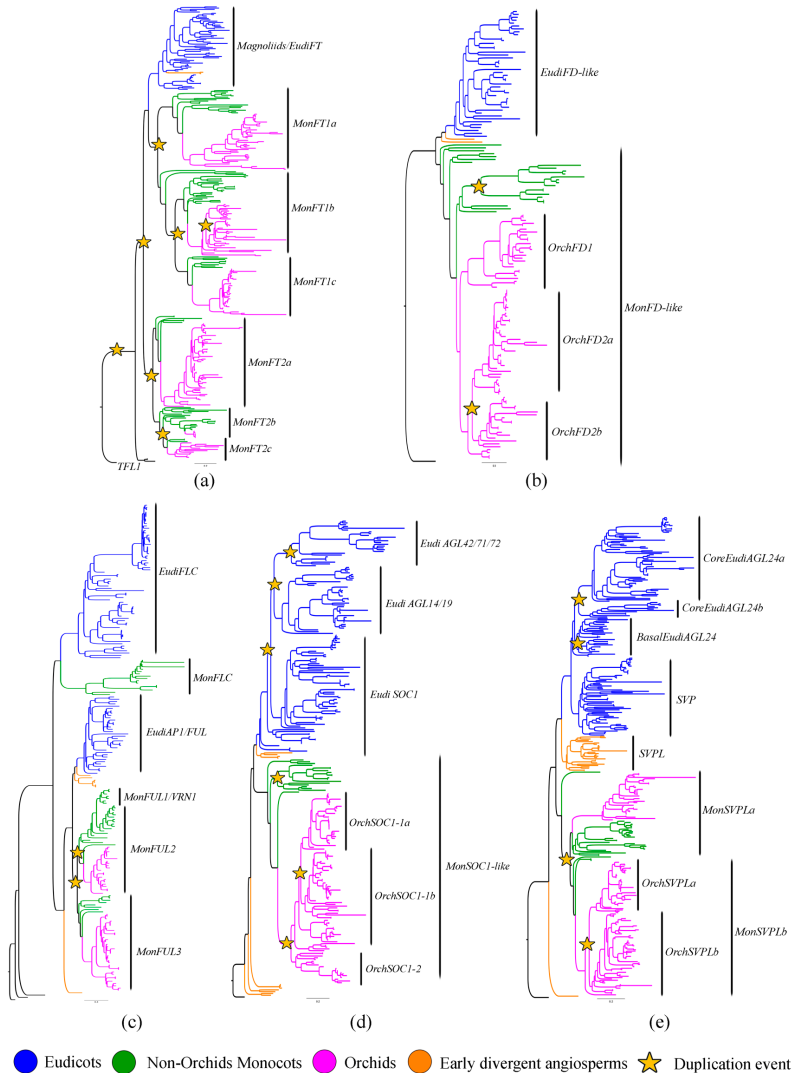

2: GRN has remarkable changes in the increase of gene copy number in orchids with unknown functions

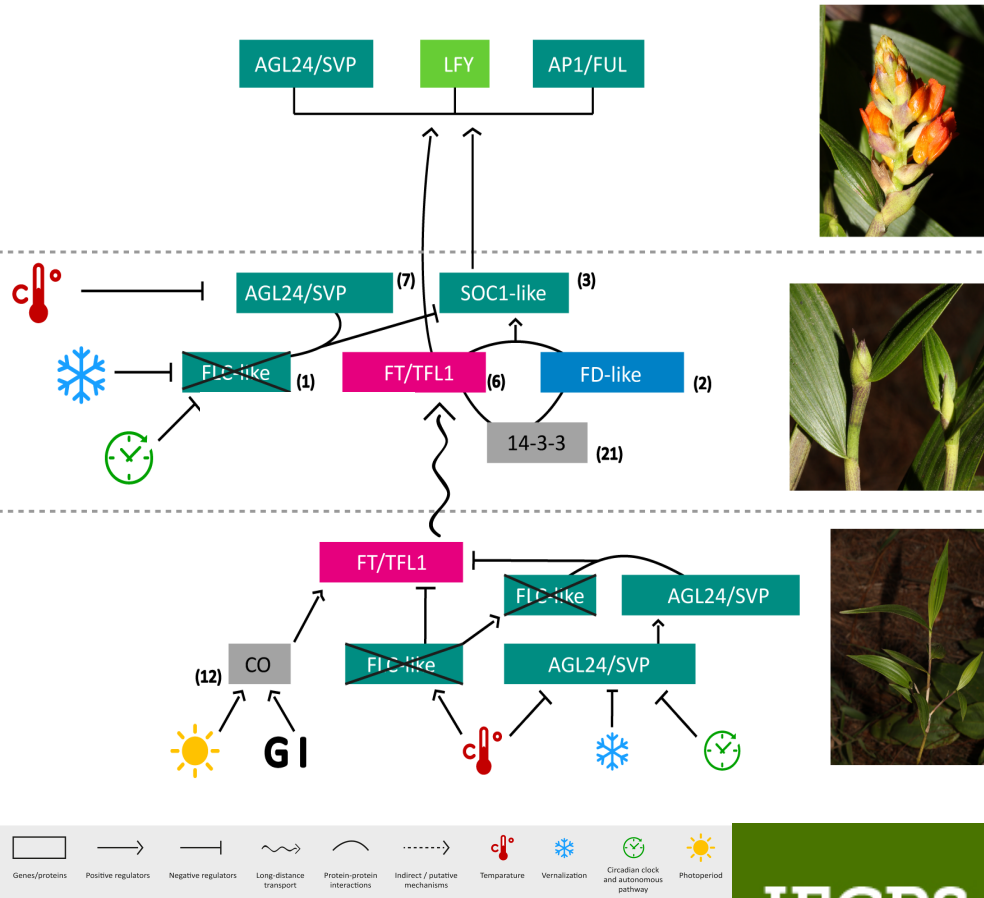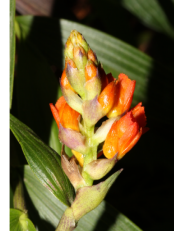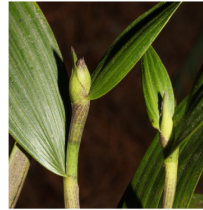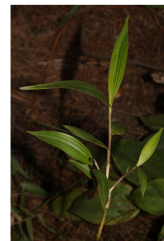

# Acknowledgments

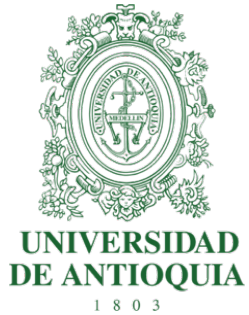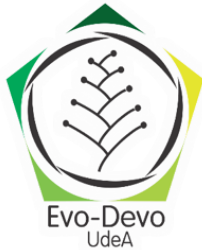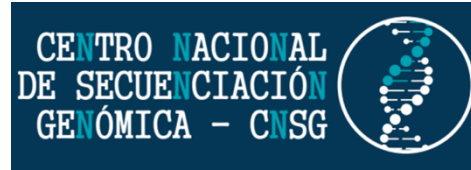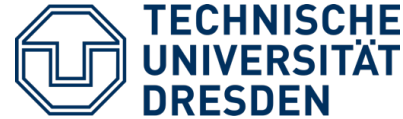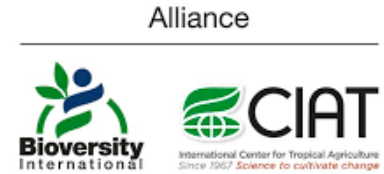

CODI Regionalización 2017  
CODI Programáticas 2017-2018

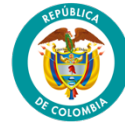

**COLCIENCIAS**

Convocatoria 808

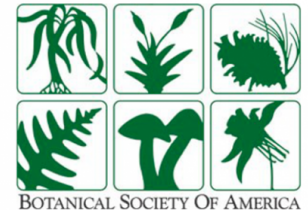

**2019 BSA Graduate  
Student Research Award**

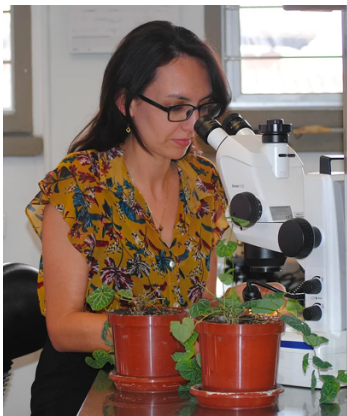

Dr. Natalia Pabon-Mora

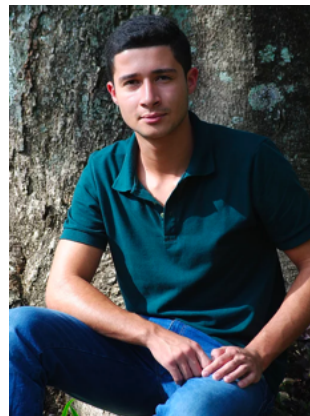

Diego Ospina-Zapata

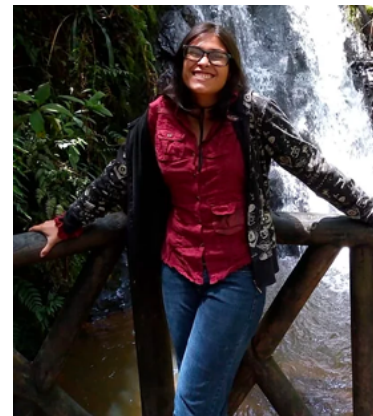

Andrea Ramirez-Ramirez

**IECPS  
2020**

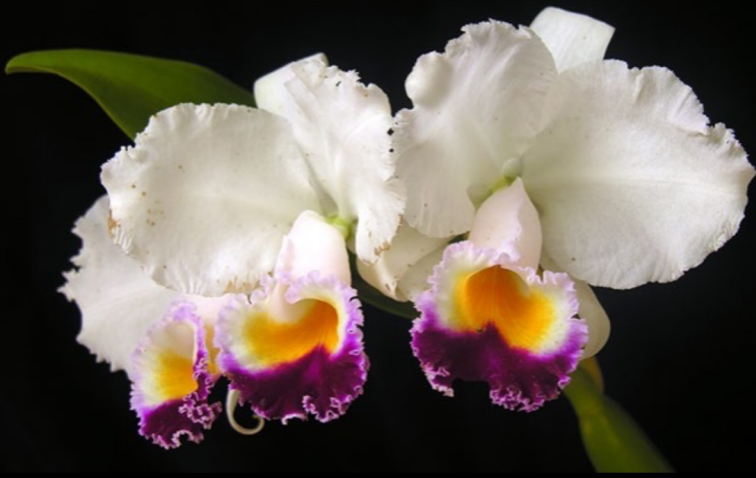

# ¿Questions?

lucia.pabon@udea.edu.co  
yesenia.madrigal@udea.edu.co

<https://www.evodevopplantas.com/>

*Thank you..*

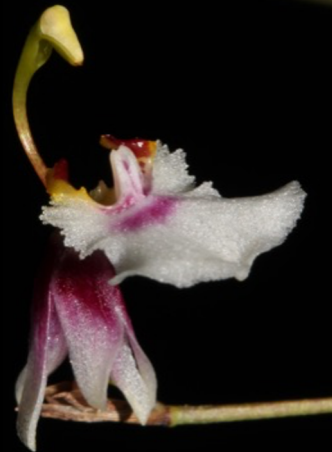

Supplement: s1 [file s1]
